# Supplementary material
Source: PubMed Central journal article supplement (PMC3932753)
Supplement: NIHMS538478-supplement-1_si_001.pdf [file NIHMS538478-supplement-1_si_001.pdf]

## Supporting Information

# Release Rates of Liposomal Contents are Controlled by Kosmotropes and Chaotropes

*Robin L. McCarley\**, *Jerimiah C. Forsythe*, *Martin Loew*, *Maria F. Mendoza*, *Nicole M. Hollabaugh*, and *James E. Winter*

Department of Chemistry, Louisiana State University, 232 Choppin Hall, Baton Rouge, Louisiana 70803-1804, United States

**Synthetic Materials and General Methods.** The Q-DOPE was prepared as previously described.<sup>1</sup> Large unilamellar vesicles (LUVs) were made using a modified protocol as described by Hope *et al.*<sup>2</sup> Dry lipid films of Q-DOPE were hydrated at room temperature with 0.050 M phosphate buffer possessing Hofmeister salt concentrations of 0.075 M or 0.500 M. Hydrated Q-DOPE suspensions were subjected to six freeze-thaw cycles, followed by 19 cycles of extrusion through a 100-nm pore Whatman Nuclepore polycarbonate track-etched membrane using a hand-held Mini-Extruder (Avanti Polar Lipids, Alabaster, AL). The Q-DOPE LUVs were roughly 120 nm in diameter, as judged by light scattering.<sup>1</sup> Liposome concentrations were adjusted to  $1 \times 10^{-4}$  M by dilution, with the concentrations being determined from UV-vis absorbance measurements using  $\epsilon_{265 \text{ nm}} = 5500 \text{ M}^{-1} \text{ cm}^{-1}$  for the quinone head group.  $4.0 \times 10^{-2}$  M calcein was encapsulated within the liposomes, and the non-encapsulated excess removed by column chromatography using Sephadex G-75. Fluorescence release traces were measured at 25 °C under argon. Reduction of the trimethyl-locked quinone head group was achieved by the addition of various molar ratios of  $\text{Na}_2\text{S}_2\text{O}_4$  in 0.050 M phosphate buffer. Differential scanning

calorimetry measurements were performed on  $1.88 \times 10^{-2}$  M DOPE using pH 7.40, 0.050 M phosphate buffer, with the appropriate concentration of added salt. DOPE samples were prepared below the reported  $T_H$  of 10 °C in pure water and subjected to six freeze/thaw cycles using liquid nitrogen and a cold-water bath at 1 °C. The DOPE suspensions were maintained below 10 °C and loaded into the calorimeter at 1.5 °C. DSC experiments were performed on a VP-DSC (Microcal, Piscataway, NJ) with a scan rate of 40 °C h<sup>-1</sup>.

Static light scattering experiments of reduced ~120-nm diameter Q-DOPE liposomes were performed using an LS55 fluorescence spectrometer from Perkin Elmer equipped to record scattered light at an angle of 90°, as described in the literature.<sup>3</sup> A xenon discharge lamp was used as the light source. The incident light was 600 nm (slit width 10 nm); the scattered light was recorded at 610 nm (slit width 10 nm). Measurements were performed in 0.050 M phosphate buffer with either 0.075 M KSCN or KCl, pH 7.40. Lipid concentration was  $1 \times 10^{-4}$  M, and the liposomes did not contain calcein. Q-DOPE liposomes that had not been reduced did not show any significant change in light scattering for periods up to a day (the maximum measured).

Zeta potentials of ~100-nm diameter Q-DOPE liposomes that had been reduced were measured using a Zetasizer Nano from Malvern. Liposomes were prepared as described above but did not contain calcein. Liposomes were anaerobically reduced by their incubation with a 5-fold molar excess of Na<sub>2</sub>S<sub>2</sub>O<sub>4</sub>, at which point they were transferred to the measurement cell of the Zetasizer. Experiments were carried out in 0.050 M phosphate buffer containing either 0.075 M KSCN or KCl, pH 7.40; the lipid concentration was  $1 \times 10^{-4}$  M. For Q-DOPE liposomes that had not been reduced, there was no observed change of zeta potential for periods up to 3 h (the maximum measured).

**Lamellar to Inverted Hexagonal Phase Transition Upon Dithionite Reduction of Q-DOPE as Judged by  $^{31}\text{P}$  NMR Spectroscopy.** Giant unilamellar vesicles, GUVs, were prepared by a modified procedure described by Hub *et al.*<sup>4</sup> Briefly, 25 mg of lipid were dissolved in 10 mL of  $\text{CHCl}_3$  which was evaporated into a homogenous lipid film inside of a round bottom flask using a rotary evaporator. The resulting film was placed under high vacuum for 1 h. The lipid was hydrated with 500 mL of 0.140 M sucrose and 0.010 M TES (*N*-[tris(hydroxymethyl)methyl]-2-aminoethanesulfonic acid) buffer, pH 7.40 without agitation for ~6 h in a water bath (70 °C) under  $\text{N}_2$ . The solution was centrifuged at 1000 x *g*, and the supernatant was decanted. The resulting pellet consisting of the lipid GUVs was then resuspended in a minimal amount (~200  $\mu\text{L}$ ) of 0.075 M KCl and 0.010 M TES buffer pH 7.40 prepared with  $\text{D}_2\text{O}$  and transferred into a Shigemi 5-mm advanced NMR microtube matched for  $\text{D}_2\text{O}$ . The GUV-containing solution was visually inspected using a wide-field optical microscope from Nikon (Diaphot 300) with a 100x oil immersion objective. The resulting diameter of the Q-DOPE vesicles ranged from 1–20  $\mu\text{m}$ . As noted in Figure S-1, the  $^{31}\text{P}$  NMR spectrum of Q-DOPE GUVs prior to reduction (A) has the characteristics expected for a lamellar liquid crystalline phase ( $\text{L}_\alpha$ ), as noted by the intense upfield peak and less intense downfield shoulder.<sup>5</sup> The line shape of Q-DOPE after reduction (B) is consistent with lipids in the inverted hexagonal micelle phase ( $\text{H}_{\text{II}}$ ).<sup>5</sup> The superimposed isotropic peak centered at roughly 1 ppm is due to rapid tumbling and diffusion of small lipid particles  $\ll 1 \mu\text{m}$  in diameter that evidently result from the reduction process.

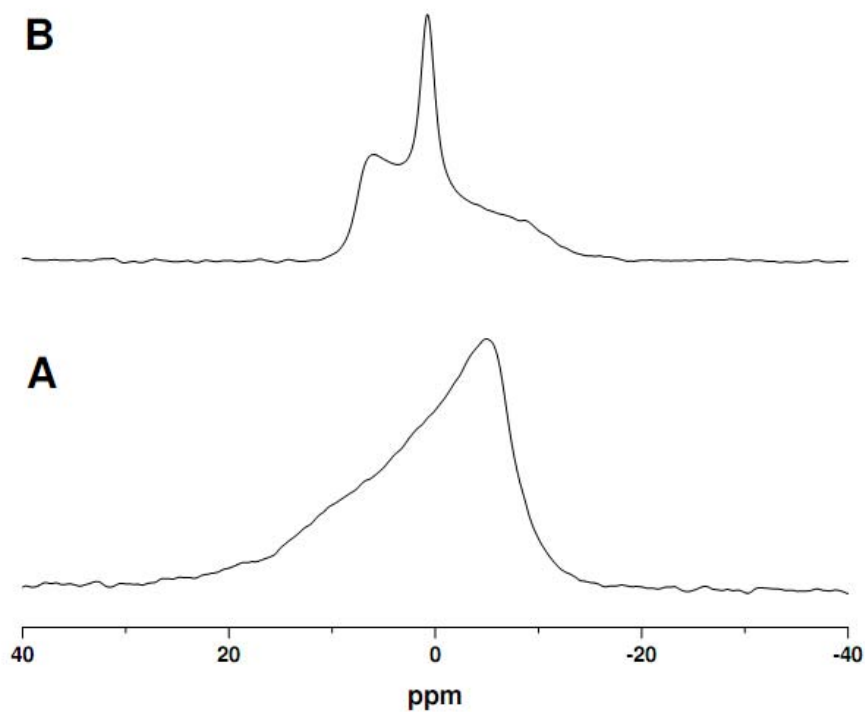

**Figure S-1.**  $^{31}\text{P}$  NMR spectra of  $\sim 0.100$  M Q-DOPE giant unilamellar vesicles, GUVs, in pD 7.40, 0.075 M KCl and 0.010 M TES buffer ( $\text{D}_2\text{O}$ ) before (A) and after (B) the addition of dithionite (2:1 mol/mol). Both spectra were generated from 40960 transients of a proton-decoupled spin echo pulse sequence on a Bruker DPX-400 spectrometer operating at 161.975 MHz.

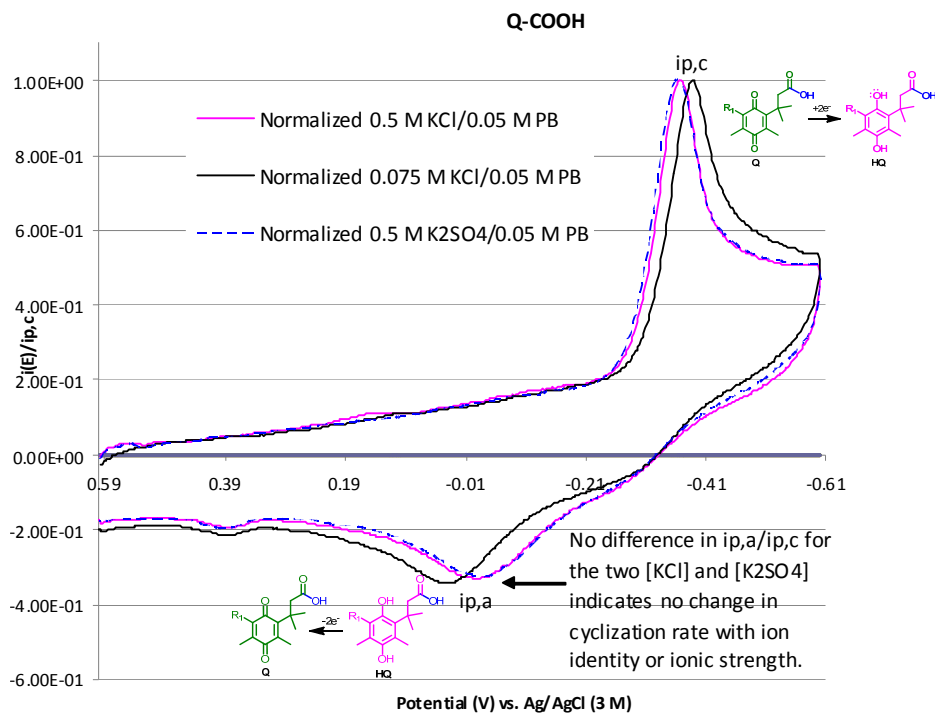

**Figure S-2.** Cyclic voltammetry of quinone propionic acid (Q-COOH;  $R_1 = \text{CH}_3$ ) in KCl and  $\text{K}_2\text{SO}_4$  showing no change in cyclization rate (cyclized lactone formation) with anion identity or concentration. A glassy carbon working electrode was used to examine  $\sim 1 \times 10^{-3}$  M solutions of the Q-DOPE cleavable head group, Q-COOH, in pH 7.10, 0.50 M phosphate buffer.

**Cyclizative Removal of Reduced Q Head Group is Unchanged in Presence of Different Anions and Anion Concentration.** The influence of anion identity and concentration on the cyclization reaction that leads to production of DOPE in the outer leaflet of the Q-DOPE liposomes was examined by measuring the peak current ratio associated with the 2-electron reduction of the quinone propionic acid in pH 7.10 aqueous solutions at a glassy carbon electrode.<sup>1</sup> If anion identity or changes in anion concentration were to accelerate the cyclization

reaction, the ratio of the anodic peak current ( $i_{p,a}$  - oxidation of the hydroquinone to the quinone) to that of the cathodic peak current ( $i_{p,c}$  - reduction of quinone to hydroquinone) should be less, due to the nature of the electrochemical-chemical (EC) reaction;<sup>6</sup> this is not found for changing the concentration of  $\text{Cl}^-$  from 0.075 M to 0.500 M or changing the anion from  $\text{Cl}^-$  to  $\text{SO}_4^{2-}$ , Figure S-2. Thus, there is no significant influence of anion identity or its concentration on the cyclization reaction.

### References Cited

- (1) Ong, W.; Yang, Y.; Cruciano, A. C.; McCarley, R. L. *J. Am. Chem. Soc.* **2008**, *130*, 14739-44.
- (2) Hope, M. J.; Bally, M. B.; Webb, G.; Cullis, P. R. *Biochim. Biophys. Acta* **1985**, *812*, 55-65.
- (3) Goldenbogen, B.; Brodersen, N.; Gramatica, A.; Loew, M.; Liebscher, J.; Herrmann, A.; Egger, H.; Budde, B.; Arbuzova, A. *Langmuir* **2011**, *27*, 10820-10829.
- (4) Hub, H. H.; Zimmermann, U.; Ringsdorf, H. *FEBS Lett.* **1982**, *140*, 254-256.
- (5) Burnell, E. E.; Cullis, P. R.; de Kruijff, B. *Biochim. Biophys. Acta* **1980**, *603*, 63-69.
- (6) Nicholson, R. S.; Shain, I. *Anal. Chem.* **1964**, *36*, 706-723.
